# Supplementary material for: Voltage-independent GluN2A-type NMDA receptor Ca2+ signaling promotes audiogenic seizures, attentional and cognitive deficits in mice
Source: PubMed Central journal article supplement (PMC7794508; doi:10.1038/s42003-020-01538-4), 2021-01-08

*Grin2a*<sup>+</sup>

G L V F N N S V

*Grin2a*<sup>S</sup>

G L V F N S S V

*Grin2a*<sup>+/+</sup>  
wt 637.1  
female

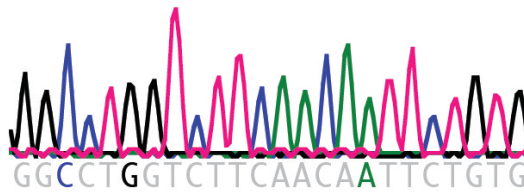

*Grin2a*<sup>+/S</sup>  
857 het  
male

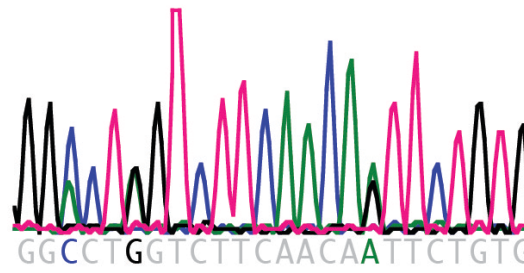

*Grin2a*<sup>+/S</sup>  
het 584.4  
female

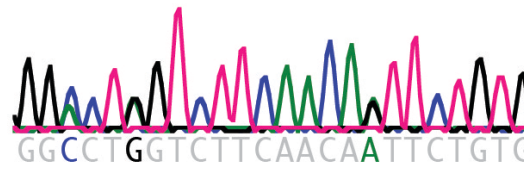

*Grin2a*<sup>+/S</sup>  
het 584.1  
female

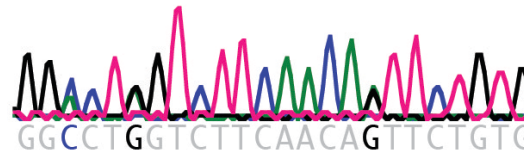

*Grin2a*<sup>+/S</sup>  
het 637.3  
female

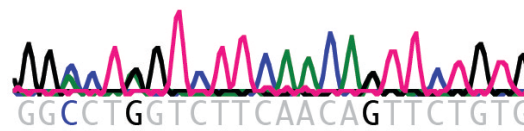

*Grin2a*<sup>+/S</sup>  
860 het  
male

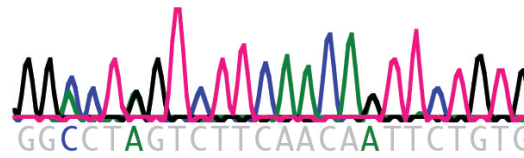

*Grin2a*<sup>+/S</sup>  
859 het  
male

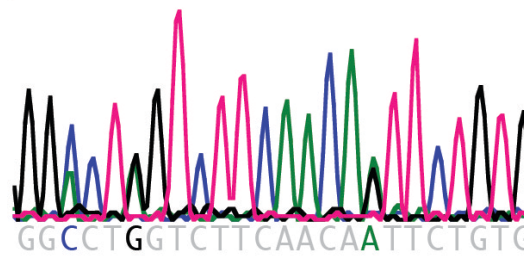

*Grin2a*<sup>+/S</sup>  
856 het  
male

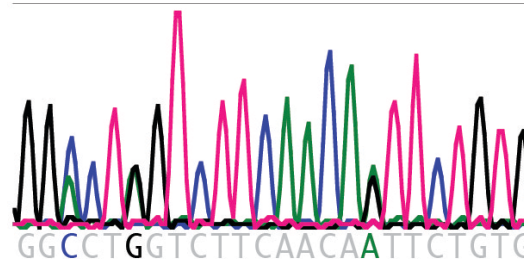

Supplement: 42003_2020_1538_MOESM7_ESM.pdf [file 42003_2020_1538_MOESM7_ESM.pdf]
